# Supplementary material
Source: PubMed Central journal article supplement (PMC5742671)
Supplement: NIHMS911587-supplement-supplement_1.pdf [file NIHMS911587-supplement-supplement_1.pdf]

# **Online Appendix: Supplemental Material**

**Supplement Table S1. Diet Contents**

**Supplement Table S2. Effect of DASH diet with low sodium versus control diet with high sodium on systolic blood pressure**

**Supplement Table S3. Effects of Sodium Reduction on Diastolic Blood Pressure**

**Supplement Table S4. Effects of the DASH diet on Diastolic Blood Pressure**

**Supplement Table S5. Effects of both low sodium and the DASH diet on Diastolic Blood Pressure**

**Supplement Table S1. Nutrient targets of the two diets used in DASH-Sodium based on a target energy consumption of 2100 kcal/day.(4)**

| Nutrient                              | Control diet | DASH diet |
|---------------------------------------|--------------|-----------|
| Total fat, % energy                   | 36           | 26        |
| Saturated fatty acids, % energy       | 15           | 5         |
| Monounsaturated fatty acids, % energy | 13           | 13        |
| Polyunsaturated fatty acid, % energy  | 8            | 8         |
| Protein, % energy                     | 15           | 18        |
| Carbohydrate, % energy                | 49           | 56        |
| Cholesterol, mg                       | 300          | 150       |
| Fiber, g                              | 11           | 32        |
| Potassium, mg                         | 1,700        | 4,700     |
| Magnesium, mg                         | 160          | 500       |
| Calcium, mg                           | 450          | 1,250     |
| Higher sodium, mg                     | 1,150        | 1,150     |
| Intermediate sodium, mg               | 2,300        | 2,300     |
| Lower sodium, mg                      | 3,450        | 3,450     |

**Supplement Table S2. Effect of DASH diet with low sodium versus control diet with high sodium on systolic blood pressure.**

| <b>Low Sodium-DASH versus High Sodium-Control</b> |           |                                          |                        |                                       |                   |
|---------------------------------------------------|-----------|------------------------------------------|------------------------|---------------------------------------|-------------------|
| <b>Baseline SBP</b>                               | <b>N*</b> | <b>Mean Difference in SBP (95% CI)**</b> | <b>P within strata</b> | <b>P versus &lt;130 mm Hg stratum</b> | <b>P trend***</b> |
| <130 mm Hg                                        | 143       | -5.30 (-7.66,-2.94)                      | <0.001                 | <i>Ref</i>                            | <0.001            |
| 130-139 mm Hg                                     | 128       | -7.48 (-10.11,-4.84)                     | <0.001                 | 0.28                                  |                   |
| 140-149 mm Hg                                     | 100       | -9.70 (-13.34,-6.06)                     | <0.001                 | 0.07                                  |                   |
| ≥150 mm Hg                                        | 24        | -20.79 (-30.88,-10.69)                   | 0.001                  | <0.001                                |                   |

\*Numbers do not entirely add to 412 due to missing measurements.

\*\*Adjusted for age, female sex, black race, and baseline body mass index

\*\*\*Based on median value in each baseline systolic blood pressure category.

**Supplement Table S3. Effect of low versus high sodium on diastolic blood pressure in the context of control and DASH diets.**

|                        |    | Reducing Sodium (Low versus High) |                        |                                   |                   |
|------------------------|----|-----------------------------------|------------------------|-----------------------------------|-------------------|
| Baseline DBP           | N* | Mean Difference in DBP (95% CI)** | <i>P</i> within strata | <i>P</i> versus <80 mm Hg stratum | <i>P</i> trend*** |
| <b>In Control Diet</b> |    |                                   |                        |                                   |                   |
| <80 mm Hg              | 13 | -3.47 (-7.67, 0.72)               | 0.11                   | <i>Ref</i>                        | 0.03              |
| 80-84 mm Hg            | 78 | -2.36 (-3.43,-1.30)               | <0.001                 | 0.61                              |                   |
| 85-89 mm Hg            | 72 | -3.12 (-4.37,-1.88)               | <0.001                 | 0.87                              |                   |
| ≥90 mm Hg              | 41 | -5.65 (-7.47,-3.84)               | <0.001                 | 0.34                              |                   |
| <b>In DASH Diet</b>    |    |                                   |                        |                                   |                   |
| <80 mm Hg              | 21 | -1.12 (-2.91, 0.67)               | 0.22                   | <i>Ref</i>                        | 0.01              |
| 80-84 mm Hg            | 87 | -0.65 (-1.54, 0.23)               | 0.15                   | 0.64                              |                   |
| 85-89 mm Hg            | 54 | -2.22 (-3.73,-0.70)               | 0.004                  | 0.36                              |                   |
| ≥90 mm Hg              | 46 | -2.68 (-3.98,-1.39)               | <0.001                 | 0.16                              |                   |

\*Numbers do not entirely add to 204 for control or 208 for DASH due to missing measurements.

\*\*Adjusted for age, female sex, black race, and baseline body mass index

\*\*\*Based on median value in each baseline diastolic blood pressure category.

**Supplement Table S4. Effect of DASH versus control diets on diastolic blood pressure according to baseline diastolic blood pressure**

| Baseline DBP                | N*  | DASH versus Control               |                        |                                      |                   |
|-----------------------------|-----|-----------------------------------|------------------------|--------------------------------------|-------------------|
|                             |     | Mean Difference in DBP (95% CI)** | <i>P within strata</i> | <i>P versus &lt;80 mm Hg stratum</i> | <i>P trend***</i> |
| <b>At High Sodium Level</b> |     |                                   |                        |                                      |                   |
| <80 mm Hg                   | 33  | -2.76 (-6.63, 1.12)               | 0.18                   | <i>Ref</i>                           | 0.25              |
| 80-84 mm Hg                 | 157 | -1.36 (-2.92, 0.19)               | 0.09                   | 0.43                                 |                   |
| 85-89 mm Hg                 | 124 | -1.71 (-3.64, 0.22)               | 0.09                   | 0.49                                 |                   |
| ≥90 mm Hg                   | 83  | -4.84 (-7.25,-2.43)               | <0.001                 | 0.31                                 |                   |
| <b>At Low Sodium Level</b>  |     |                                   |                        |                                      |                   |
| <80 mm Hg                   | 33  | -0.74 (-3.28, 1.81)               | 0.58                   | <i>Ref</i>                           | 0.43              |
| 80-84 mm Hg                 | 159 | 0.47 (-1.10, 2.04)                | 0.56                   | 0.57                                 |                   |
| 85-89 mm Hg                 | 123 | -0.65 (-2.48, 1.17)               | 0.48                   | 0.90                                 |                   |
| ≥90 mm Hg                   | 79  | -1.87 (-4.20, 0.46)               | 0.12                   | 0.45                                 |                   |

\*Numbers do not entirely add to 412 due to missing measurements.

\*\*Adjusted for age, female sex, black race, and baseline body mass index

\*\*\*Based on median value in each baseline diastolic blood pressure category.

**Supplement Table S5. Effect of DASH diet with low sodium versus control diet with high sodium on diastolic blood pressure.**

| <b>Low Sodium-DASH versus High Sodium-Control</b> |           |                                          |                               |                                             |                          |
|---------------------------------------------------|-----------|------------------------------------------|-------------------------------|---------------------------------------------|--------------------------|
| <b>Baseline DBP</b>                               | <b>N*</b> | <b>Mean Difference in DBP (95% CI)**</b> | <b><i>P</i> within strata</b> | <b><i>P</i> versus &lt;80 mm Hg stratum</b> | <b><i>P</i> trend***</b> |
| <80 mm Hg                                         | 33        | -3.65 (-6.93,-0.37)                      | 0.04                          | <i>Ref</i>                                  | 0.001                    |
| 80-84 mm Hg                                       | 158       | -2.00 (-3.57,-0.43)                      | 0.01                          | 0.27                                        |                          |
| 85-89 mm Hg                                       | 122       | -3.80 (-5.75,-1.84)                      | <0.001                        | 0.81                                        |                          |
| ≥90 mm Hg                                         | 82        | -7.87 (-10.28,-5.45)                     | <0.001                        | 0.08                                        |                          |

\*Numbers do not entirely add to 412 due to missing measurements.

\*\*Adjusted for age, female sex, black race, and baseline body mass index

\*\*\*Based on median value in each baseline diastolic blood pressure category.
